# Supplementary material
Source: Springer Nature journal article supplement (https://www.springermedizin.de/resource/supplementary/12990_2008_142_MOESM2_ESM.pdf/9612662)

# A normal

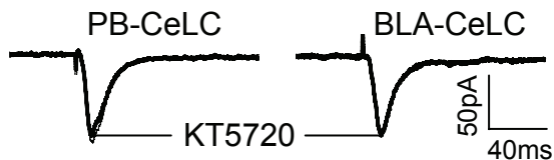

# B arthritis

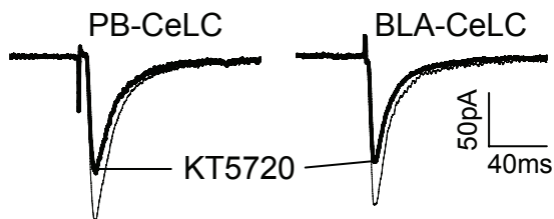

# C normal

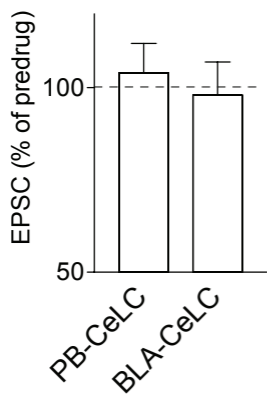

# D arthritis

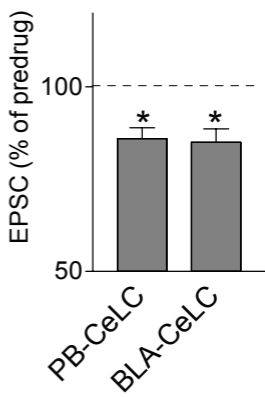

# E

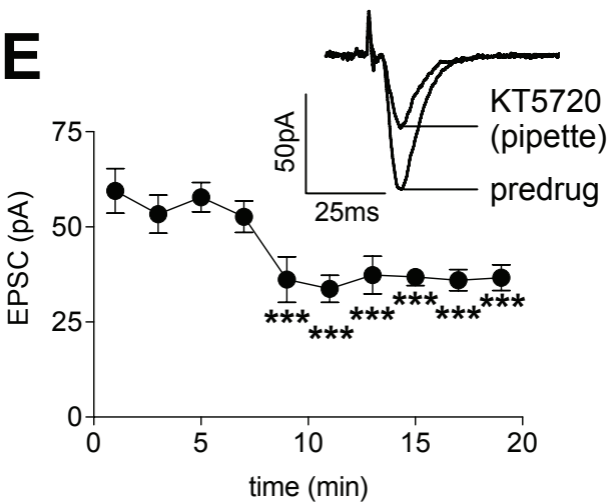

Supplement: MOESM2 [file 9612662]
